# Supplementary material
Source: ML conference proceedings conference paper supplement (https://openreview.net/forum?id=mOK4yD8JFd)
Supplement: supplementary_material [file attachment]

---

# Supplementary Material: Quality-Improved and Property-Preserved Polarimetric Imaging via Complementarily Fusing

---

Chu Zhou<sup>1†</sup> Yixing Liu<sup>2,3</sup> Chao Xu<sup>4</sup> Boxin Shi<sup>2,3\*</sup>

<sup>1</sup>National Institute of Informatics, Japan

<sup>2</sup>State Key Laboratory for Multimedia Information Processing, School of CS, Peking University, China

<sup>3</sup>National Engineering Research Center of Visual Technology, School of CS, Peking University, China

<sup>4</sup>National Key Laboratory of General Artificial Intelligence, School of IST, Peking University, China

zhou\_chu@hotmail.com,

{luiginixy@stu., xuchao@cis., shiboxin@}pku.edu.cn

## A. More information about the Stokes parameters

When placing a polarizer with polarizer angle  $\alpha$  in front of the camera, according to the Malus' law [3], the captured polarized image<sup>1</sup>  $\mathbf{I}_\alpha$  can be calculated as

$$\mathbf{I}_\alpha = \frac{1}{2} \mathbf{I} \cdot (1 - \mathbf{p} \cdot \cos(2(\alpha - \theta))), \quad (1)$$

where  $\mathbf{I}$  denotes the total intensity of the light, which can be regarded as the unpolarized image (*i.e.*, the image captured without using the polarizer),  $\mathbf{p} \in [0, 1]$  and  $\theta \in [0, \pi]$  denote the degree of polarization (DoP) and the angle of polarization (AoP) of the incoming light to the sensor respectively. Reformulating Eq. (1) into a polynomial form,  $\mathbf{I}_\alpha$  can be expressed as a linear combination of three parameters  $\mathbf{S}_{0,1,2}$ :

$$\mathbf{I}_\alpha = \frac{1}{2} \mathbf{S}_0 - \frac{1}{2} \cos(2\alpha) \cdot \mathbf{S}_1 - \frac{1}{2} \sin(2\alpha) \cdot \mathbf{S}_2, \quad (2)$$

$$\text{where } \begin{cases} \mathbf{S}_0 = \mathbf{I} \\ \mathbf{S}_1 = \mathbf{I} \cdot \mathbf{p} \cdot \cos(2\theta) \\ \mathbf{S}_2 = \mathbf{I} \cdot \mathbf{p} \cdot \sin(2\theta) \end{cases} \quad (3)$$

are called the Stokes parameters [4] of the incoming light to the sensor. Once  $\mathbf{S}_{0,1,2}$  are available, the DoP  $\mathbf{p}$  and AoP  $\theta$  could be acquired by

$$\mathbf{p} = \frac{\sqrt{\mathbf{S}_1^2 + \mathbf{S}_2^2}}{\mathbf{S}_0} \quad \text{and} \quad \theta = \frac{1}{2} \arctan\left(\frac{\mathbf{S}_2}{\mathbf{S}_1}\right). \quad (4)$$

The downstream polarization-based vision applications (*e.g.*, reflection removal [5], shape from polarization [2], dehazing [9], *etc.*) usually require the DoP  $\mathbf{p}$  and AoP  $\theta$  to provide physical clues. To acquire  $\mathbf{p}$  and  $\theta$ , we need at least three polarized images with different polarizer angles since Eq. (3) contains three unknowns  $\mathbf{S}_{0,1,2}$ . In practice, instead of using a conventional camera equipped with a polarizer to capture three times by rotating the polarizer, using a polarization camera could be more convenient. This is because a polarization camera (*e.g.*, the Lucid Vision Phoenix polarization

---

<sup>†</sup> Most of this work was done as a PhD student at Peking University.

<sup>\*</sup> Corresponding author.

<sup>1</sup>Here we assume the camera response function to be linear since the polarization cameras usually output images with a linear camera response function. Besides, we only focus on linear polarization (*i.e.*, do not consider circular polarization) since polarization cameras only equip linear polarizers.

camera used in this work) can capture a polarized snapshot  $\mathcal{I}$  consisting of four polarized images  $\mathbf{I}_{\alpha_{1,2,3,4}}$  with different polarizer angles  $\alpha_{1,2,3,4} = 0^\circ, 45^\circ, 90^\circ, 135^\circ$  in a single shot. Plugging  $\alpha_{1,2,3,4}$  into Eq. (1), Eq. (2), and Eq. (3), we could deduce that the Stokes parameters  $\mathbf{S}_{0,1,2}$  can be directly calculated from  $\mathbf{I}_{\alpha_{1,2,3,4}}$ :

$$\begin{cases} \mathbf{S}_0 = \frac{1}{2}(\mathbf{I}_{\alpha_1} + \mathbf{I}_{\alpha_2} + \mathbf{I}_{\alpha_3} + \mathbf{I}_{\alpha_4}) = \mathbf{I}_{\alpha_1} + \mathbf{I}_{\alpha_3} = \mathbf{I}_{\alpha_2} + \mathbf{I}_{\alpha_4} \\ \mathbf{S}_1 = \mathbf{I}_{\alpha_3} - \mathbf{I}_{\alpha_1} \\ \mathbf{S}_2 = \mathbf{I}_{\alpha_4} - \mathbf{I}_{\alpha_2} \end{cases}, \quad (5)$$

making the acquisition of  $\mathbf{p}$  and  $\theta$  much more easily.

## B. Additional results on synthetic data

In this section, we provide additional visual quality comparisons on synthetic data among our framework, the state-of-the-art polarized image low-light enhancement method PLIE [10] and its improved version PLIE+, the only existing polarized image deblurring method PolDeblur [11] and its improved version PolDeblur+, and four learning-based image enhancement methods designed for conventional images that also fuse noisy and blurry pairs (LSD2 [6], LSFNet [1], SelfIR [7], and D2HNet [8]), as shown in Fig. A., Fig. B., and Fig. C..

## C. Additional results on real data

In this section, we provide additional visual quality comparisons on real data among our framework, the state-of-the-art polarized image low-light enhancement method PLIE [10] and its improved version PLIE+, the only existing polarized image deblurring method PolDeblur [11] and its improved version PolDeblur+, and four learning-based image enhancement methods designed for conventional images that also fuse noisy and blurry pairs (LSD2 [6], LSFNet [1], SelfIR [7], and D2HNet [8]), as shown in Fig. D., Fig. E., and Fig. F..

## References

- [1] Meng Chang, Huajun Feng, Zhihai Xu, and Qi Li. Low-light image restoration with short-and long-exposure raw pairs. *IEEE Transactions on Multimedia*, 24:702–714, 2021.
- [2] Valentin Deschaintre, Yiming Lin, and Abhijeet Ghosh. Deep polarization imaging for 3D shape and SVBRDF acquisition. In *Proc. of Computer Vision and Pattern Recognition*, 2021.
- [3] Eugene Hecht. *Optics*. Pearson Education India, 2012.
- [4] GP Können. *Polarized light in nature*. CUP Archive, 1985.
- [5] Youwei Lyu, Zhaopeng Cui, Si Li, Marc Pollefeys, and Boxin Shi. Reflection separation using a pair of unpolarized and polarized images. In *Proc. of Advances in Neural Information Processing Systems*, 2019.
- [6] Janne Mustaniemi, Juho Kannala, Jiri Matas, Simo Särkkä, and Janne Heikkilä. LSD2 - joint denoising and deblurring of short and long exposure images with CNNs. In *Proc. of British Machine Vision*, 2020.
- [7] Zhilu Zhang, RongJian Xu, Ming Liu, Zifei Yan, and Wangmeng Zuo. Self-supervised image restoration with blurry and noisy pairs. *Advances in Neural Information Processing Systems*, 35:29179–29191, 2022.
- [8] Yuzhi Zhao, Yongzhe Xu, Qiong Yan, Dingdong Yang, Xuehui Wang, and Lai-Man Po. D2HNet: Joint denoising and deblurring with hierarchical network for robust night image restoration. In *Proc. of European Conference on Computer Vision*, pages 91–110, 2022.
- [9] Chu Zhou, Minggui Teng, Yufei Han, Chao Xu, and Boxin Shi. Learning to dehaze with polarization. In *Proc. of Advances in Neural Information Processing Systems*, 2021.
- [10] Chu Zhou, Minggui Teng, Youwei Lyu, Si Li, Chao Xu, and Boxin Shi. Polarization-aware low-light image enhancement. In *Proc. of the AAAI Conference on Artificial Intelligence*, pages 3742–3750, 2023.
- [11] Chu Zhou, Minggui Teng, Xinyu Zhou, Chao Xu, and Boxin Sh. Learning to deblur polarized images. *arXiv preprint arXiv:2402.18134*, 2024.

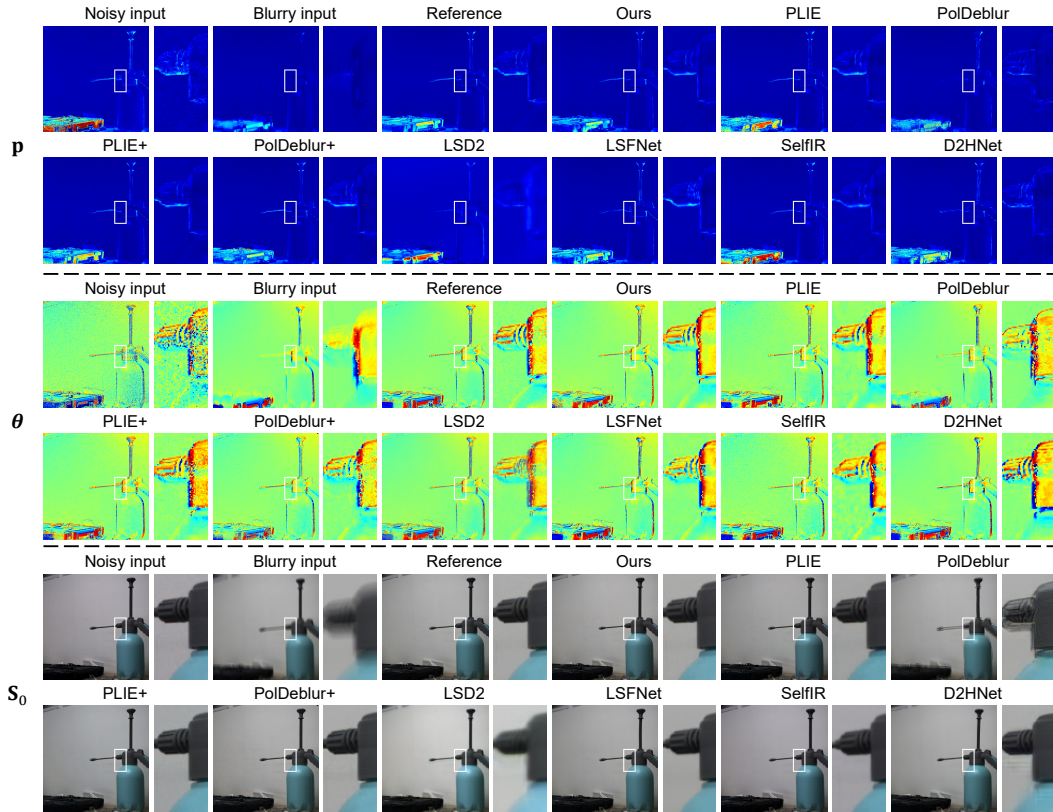

Figure A.: Additional visual quality comparisons on synthetic data (part1).

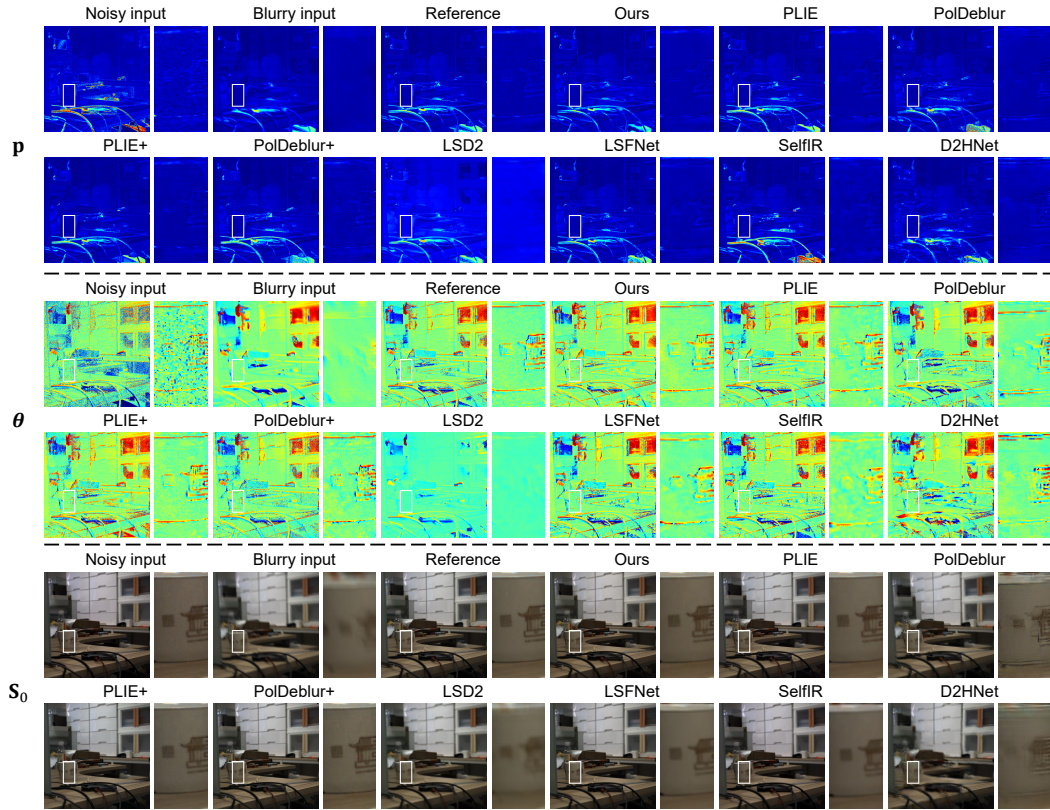

Figure B.: Additional visual quality comparisons on synthetic data (part2).



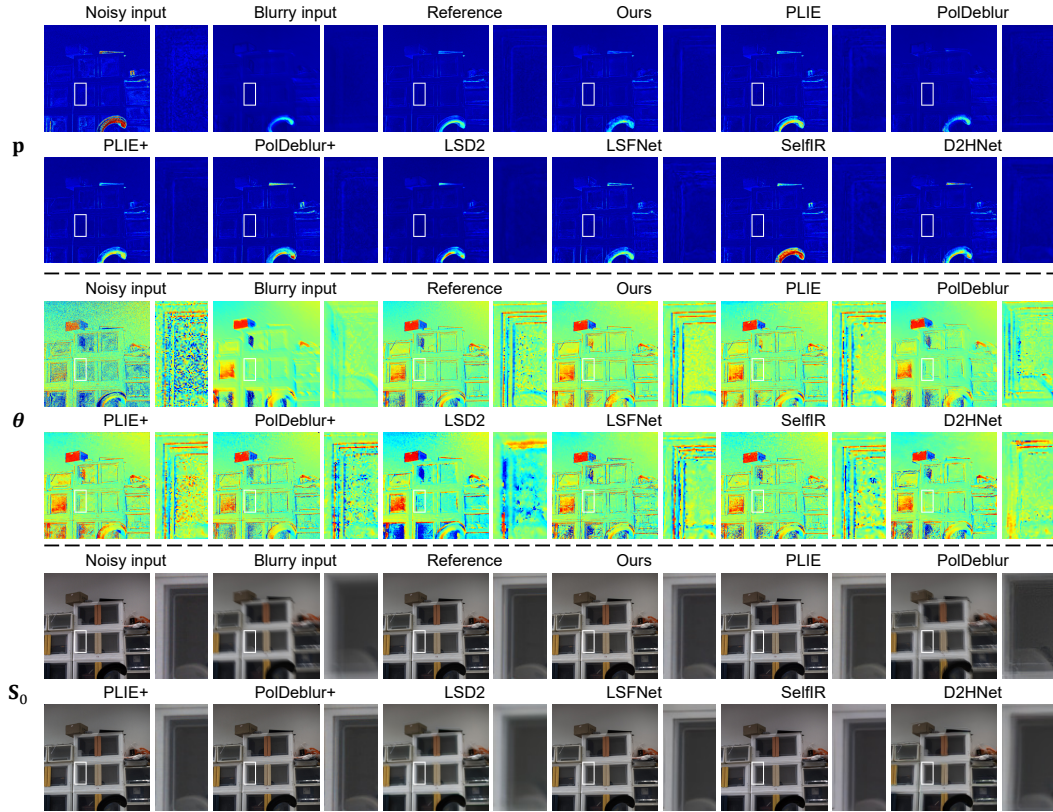

Figure C.: Additional visual quality comparisons on synthetic data (part3).

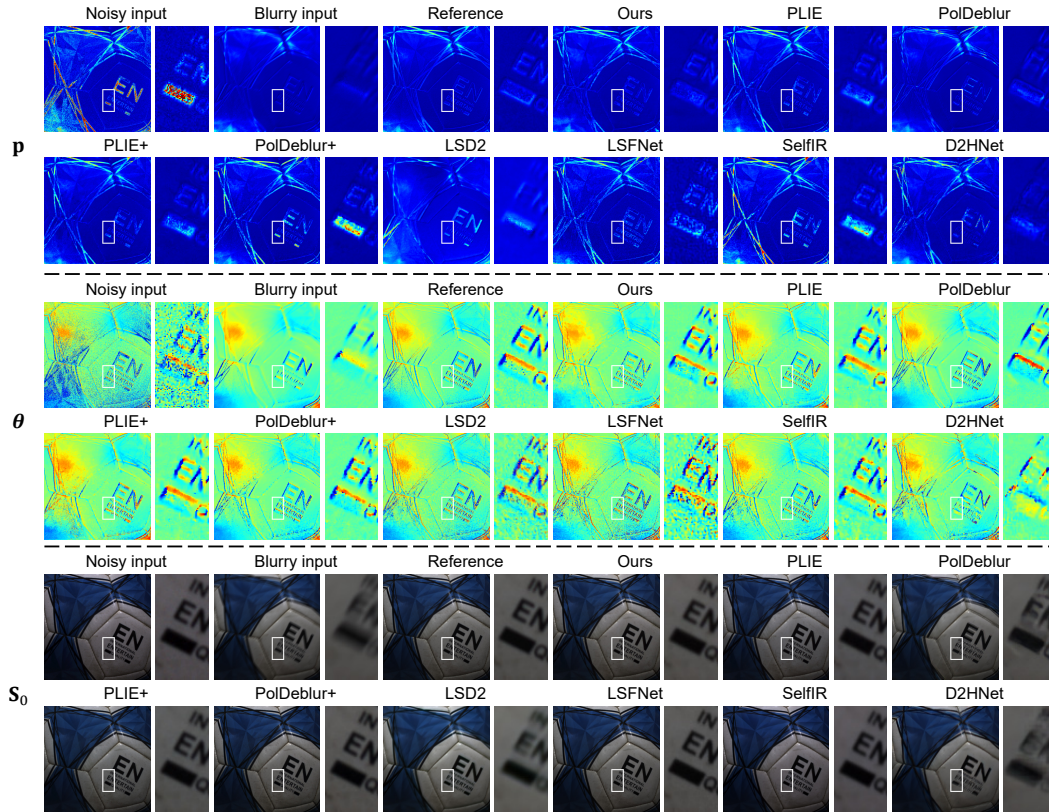

Figure D.: Additional visual quality comparisons on real data (part1).

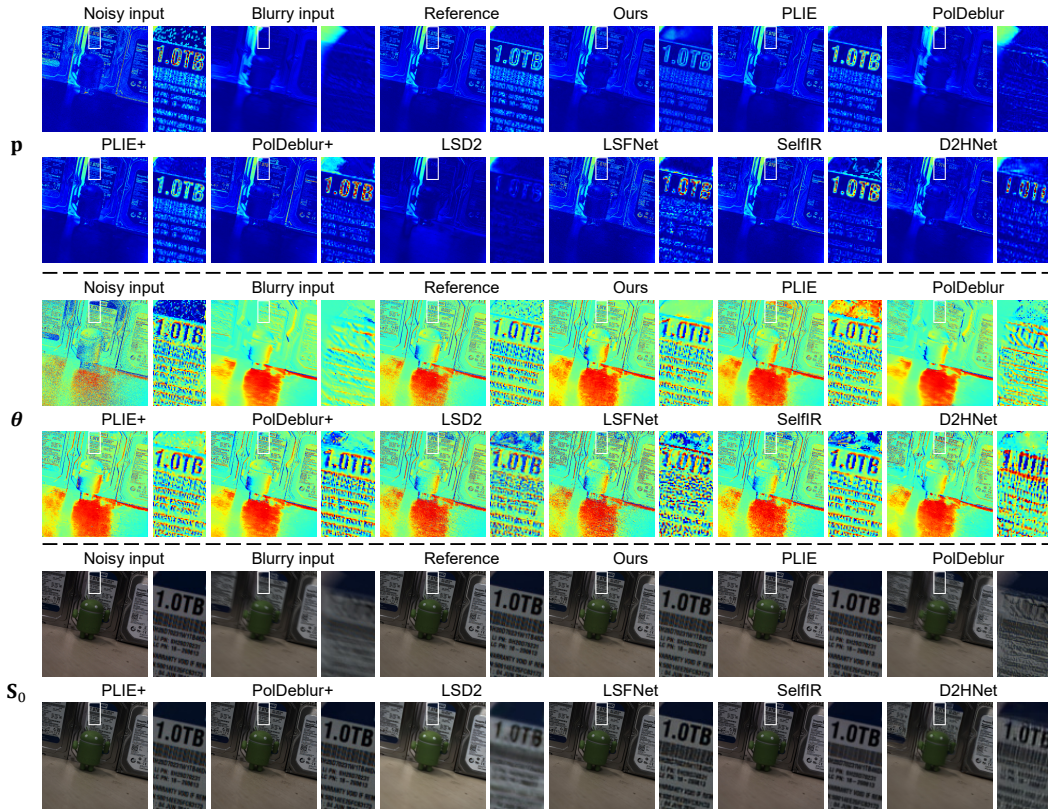

Figure E.: Additional visual quality comparisons on real data (part2).



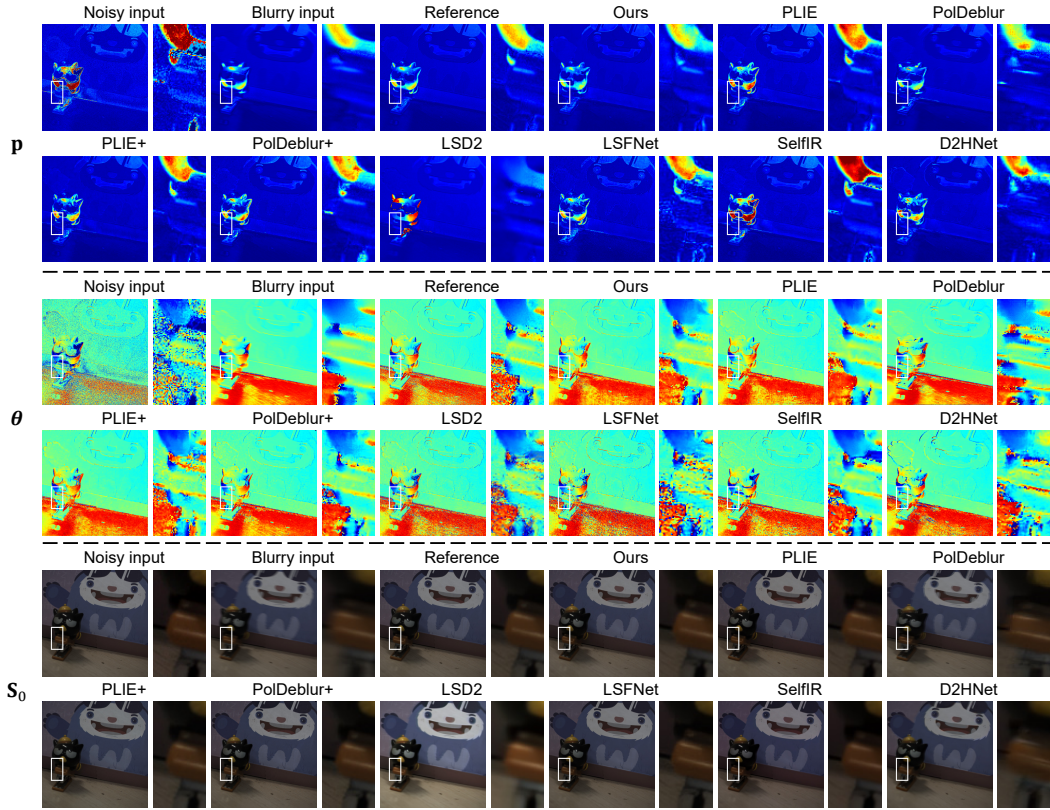

Figure F.: Additional visual quality comparisons on real data (part3).
